# Supplementary material
Source: Springer Nature journal article supplement (https://www.springermedizin.de/resource/supplementary/12889_2011_3925_MOESM4_ESM.pdf/9491110)

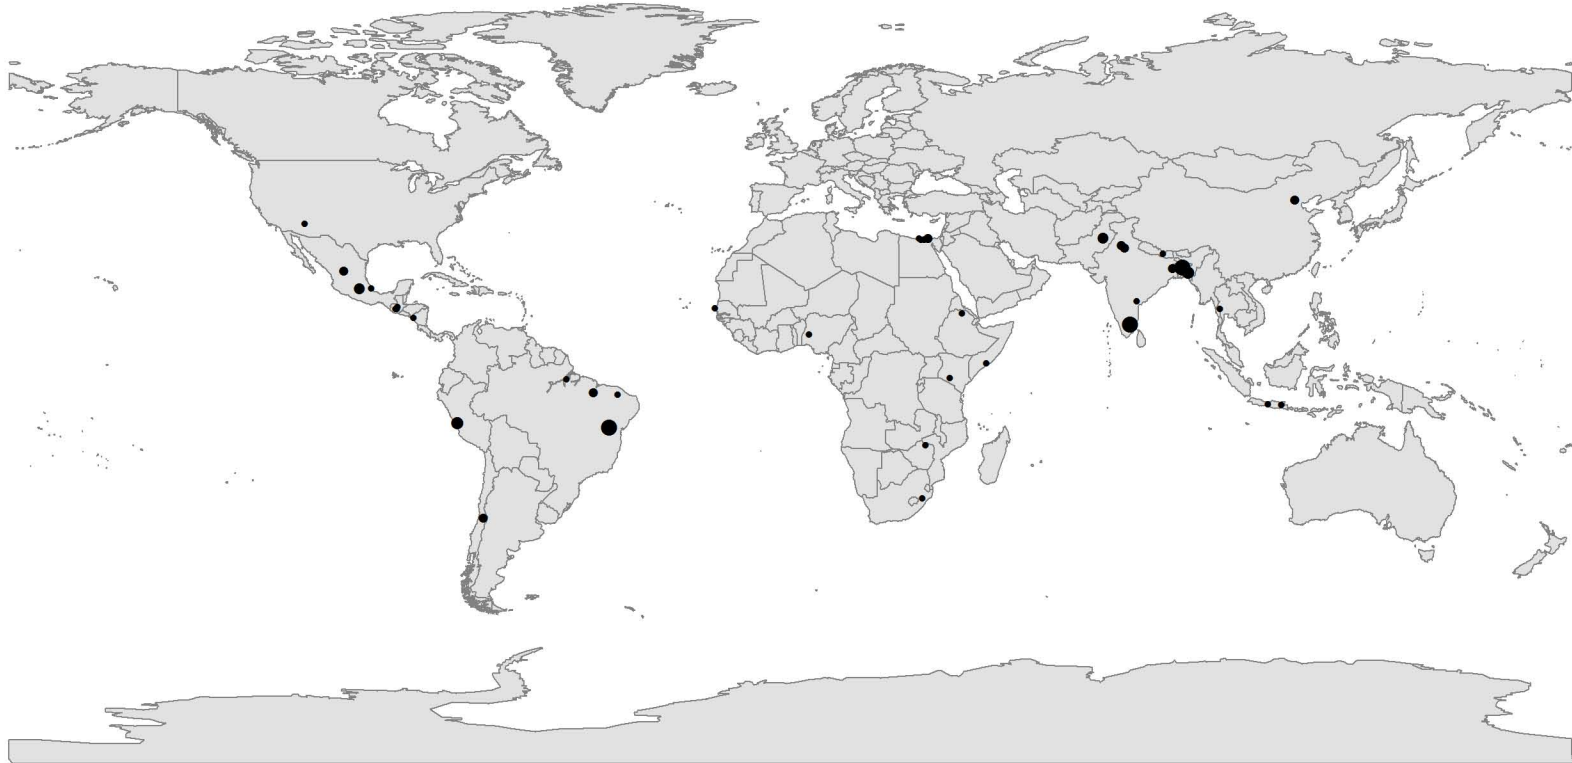

- One Study
- Two Studies
- Three Studies
- Four Studies
- Six Studies

Supplement: MOESM4 [file 9491110]
